# Supplementary material
Source: Springer Nature journal article supplement (https://www.springermedizin.de/resource/supplementary/13054_2013_2855_MOESM4_ESM.pdf/9713792)

- Death
- Continuation
- Resolution

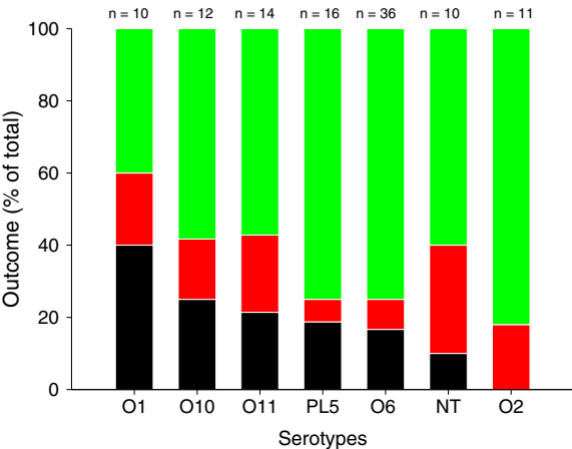

Supplement: MOESM4 [file 9713792]
